# Supplementary material for: Optogenetic activation of septal GABAergic afferents entrains neuronal firing in the medial habenula
Source: PubMed Central journal article supplement (PMC5050514; doi:10.1038/srep34800), 2016-10-05
Supplement: srep34800-s1.pdf [file srep34800-s1.pdf]

## Supplementary Information

**Optogenetic activation of septal GABAergic afferents entrains neuronal firing in the medial habenula**

Kyuhyun Choi,<sup>1</sup> Youngin Lee,<sup>1</sup> Changwoo Lee,<sup>1</sup> Seokheon Hong,<sup>2</sup> Soonje Lee,<sup>1</sup> Shin Jung Kang,<sup>2</sup> Ki Soon Shin<sup>1,\*</sup>

<sup>1</sup>Department of Biology, Department of Life and Nanopharmaceutical Sciences, Kyung Hee University, Seoul, Republic of Korea; <sup>2</sup>Department of Molecular Biology, Sejong University, Seoul, Republic of Korea

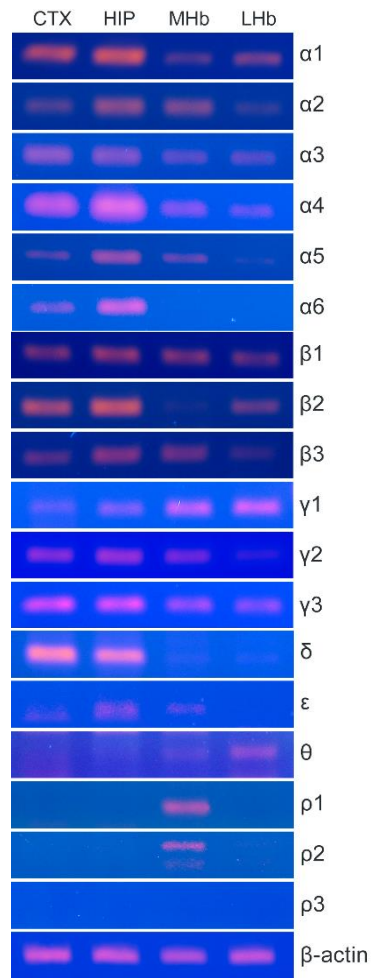

**Supplementary Figure S1. mRNA expression of GABA<sub>A</sub> receptor subtypes in different brain regions.** A representative example of the RT-PCR products specific for each GABA<sub>A</sub> receptor subtype mRNA is shown. CTX, cortex; HIP, hippocampus; MHb, medial habenula; LHb, lateral habenula. Detailed method is described in Materials and Method in the main text.
